# Supplementary material for: Precision medicine screening using whole-genome sequencing and advanced imaging to identify disease risk in adults
Source: PubMed Central journal article supplement — Proc Natl Acad Sci U S A. 2018 Mar 19;115(14):3686–91. doi: 10.1073/pnas.1706096114 (PMC5889622; doi:10.1073/pnas.1706096114), 2018-03-19
Supplement: pnas.201706096SI.pdf [file pnas.201706096SI.pdf]

# Supporting Information

Perkins et al. 10.1073/pnas.1706096114

## SI Materials and Methods

Selected data were collected regarding personal medical and family history, risk factors, and medical symptoms before or during study participant visit. Validated questions from the US NHANES were used to collect selected aspects of personal medical and family history and risk factors (Table S4) to facilitate comparison of our study participants with an age- and sex-adjusted US population-based cohort (Table 1). Participants were instructed to stop taking supplements for 72 h and to fast after dinner the night before their morning appointment. On the day of the visit, blood was obtained for WGS (Human Longevity, Inc.) (9), global metabolomics (12, 20, 21) and a new blood test for prediabetes (Quantose IR; Metabolon) (22), and routine clinical laboratory tests (Laboratory Corporation of America) (Table S5). The new blood test for prediabetes (Quantose IR, with its unique biomarkers and algorithm) was discovered and developed based on the correlation with the hyperinsulinemic–euglycemic clamp values, and it is a more accurate test for insulin resistance (22, 57–60). Two-week cardiac rhythm monitoring (Zio XT Patch; iRhythm Technologies, Inc.) kits were applied during study visit or provided with instructions for home application. Height, weight, and sitting blood pressure (61) were obtained.

Genomic variants were annotated using integrated public and proprietary annotation sources in the HLI database, including ClinVar (62) and HGMD Professional (Qiagen). Monogenic rare variants were classified as pathogenic, likely pathogenic, and variant of uncertain significance. The HLI database integrates allele frequencies for variants derived from the HLI database of >12,000 sequences and provides a platform for query of these variants with annotation data.

To identify potentially medically significant rare monogenic variants, we used an internal version of Open Search (release 0.27) (9) in a two-step process: the first step focused on allele frequency <1% in the HLI cohort with annotation using ClinVar and HGMD Professional as well as predicted loss of function variants; the second step focused on participant-specific phenotype-driven queries using an allele frequency of <1% based on family and individual medical history as well as abnormal clinical testing results.

Global metabolic profiling was performed using ultrahigh-performance liquid-phase chromatography separation coupled with tandem MS to assess the metabolic penetrance of the variants in these subject (12, 20, 21). Z scores were calculated for all metabolites in each subject against a reference cohort consisting of 42 fasted subjects of normal health, and metabolites with Z scores below the 2.5th percentile or above the 97.5th percentile of the reference cohort were indicative of metabolic abnormalities that warranted further investigation. The process of cross-referencing the genomics data and metabolomics data was like that in our previous publications (12, 20). We used sequence interpretation by variant features and databases to determine metabolic genes with potential impairment. Biochemical pathway analysis of the metabolomics data was used to interpret the functionality. Each case was manually curated using this methodology by our experts in clinical genomic medicine.

Study participants underwent noncontrast whole-body MRI (Discovery MR750w 3.0T) in research mode (GE Healthcare) using protocols and postprocessing for volumetric brain imaging (Neuroquant; CorTechs Labs), cancer detection (using restriction spectrum imaging), neurovascular and cardiovascular visualization, liver-specific fat and iron estimation, and quantitative body compartment-specific fat and muscle estimation (Advanced MR Analytics AB) (19); other postprocessing was done by Multimodality Imaging Services (author A.M.D.). DXA was conducted using

Lunar iDXA with Pro Package (GE Healthcare) and was used for skeletal and metabolic health assessment. MRI and DXA images were interpreted by author D.S.K. A Vivid\* E95 Ultrasound System (GE Healthcare) was used for ECHO. ECHO, ECG, and 2-wk cardiac rhythm monitoring were interpreted by author A.M.K. Out of normal range signals were evaluated by modality for routine clinical laboratories, whole-body MRI, DXA, ECHO, ECG, and 2-wk cardiac rhythm monitoring. These findings are summarized for participants with likely clinical correlations with genomic findings (Table 2 and Table S2) to apply case definitions for five diseases or conditions, including diabetes and diabetes risk, atherosclerosis or atherosclerosis risk, metabolic syndrome, NAFLD, and NASH (Fig. 2) and those with previously unrecognized age-related chronic disease risk requiring prompt (<30 d) medical attention (Table S3). The proportion of study participants who received a recommendation for follow-up imaging is reported.

Baseline characteristics, including reported past medical history for major categories of age-related chronic diseases by study participants, were compared with responses from the NHANES, a US population-based cohort, adjusted for age and sex distributions (Table 1 and Table S4).

Participants with likely clinical correlations with genomic findings were identified by expert review to identify convergent genomic and clinical (or phenotype) data relationships including at least three generations of pedigree- and metabolite-level correlation based on pathway mapping (Table 2). Clinical data were collected before and independent of genomic findings. Clinical data were used in WGS variant interpretation as supporting evidence for pathogenicity (e.g., “PP1: Cosegregation with disease in multiple affected family members in a gene definitively known to cause the disease, and PP5: Patient’s phenotype or family history is highly specific for a single genetic etiology”) (26, 27).

Participants with evidence of age-related chronic disease or disease risk factors were identified as having (i) type 2 diabetes (34), prediabetes (34), and insulin resistance (Quantose IR) (22); (ii) likely atherosclerotic disease or at-risk; (iii) metabolic syndrome (35); or (iv) NAFLD or NASH based on clinical guidelines or other recent literature. Measured fasting blood glucose, hemoglobin A1c, personal medical history for diabetes, or Quantose IR was used to identify participants as having diabetes, prediabetes, or insulin resistance. The presence of any of the following was considered to be evidence of likely atherosclerotic disease or risk [“yes” in response to any of the following questions: (i) ever told you had coronary artery disease, (ii) ever told you had a heart attack, (iii) ever told you had congestive heart failure, (iv) taking prescription for hypertension, and (v) taking prescription for cholesterol] or if sitting blood pressure > normal, LDL cholesterol > normal, or lipoprotein-associated phospholipase A<sub>2</sub> > normal. The presence of any three of the following five criteria was considered to be evidence of metabolic syndrome: (i) visceral adipose tissue measured by MRI (postprocessing by Advanced MR Analytics)  $\geq 2$  SD above normal (19) or android/gynoid fat measured by DXA > normal, (ii) triglycerides  $\geq 150$  mg/dL, (iii) HDL cholesterol <40 mg/dL in men and <50 mg/dL in women or the participant is currently taking prescribed medicine for high cholesterol, (iv) blood pressure  $\geq 130/85$  mmHg or the participant is currently taking prescription for hypertension, or (v) measured fasting glucose or hemoglobin A1c indicates prediabetes (35) or “borderline” in response to the question of if a doctor told you that you have diabetes. The presence of NAFLD or NASH was considered likely if, for NAFLD, MRI-based estimated liver fat was <4% and did not have alcohol dependence, and for these

individuals, we used a formula including other demographic and laboratory data to identify likely NASH (36).

Study participants with previously unrecognized age-related chronic disease risk requiring prompt (<30 d) medical atten-

tion were defined as having a new genomic and/or other clinical findings, which based on current medical practice, indicated the need for medical attention to avoid potentially life-threatening consequences immediately or within 30 d from their visit.

**Table S1. Variant annotation**

| Variant type            | SNVs       |                             | Indels    |                                 |
|-------------------------|------------|-----------------------------|-----------|---------------------------------|
|                         | All sites  | High confidence region only | All sites | High confidence region only (9) |
| Total                   | 21,761,709 | 18,616,803                  | 5,721,120 | 3,799,425                       |
| Annotation              |            |                             |           |                                 |
| Intergenic_region       | 10,286,095 | 8,599,254                   | 2,659,418 | 1,659,136                       |
| Intron_variant          | 10,885,401 | 9,657,406                   | 2,965,523 | 1,891,268                       |
| Non_coding_exon_variant | 510,613    | 420,384                     | 70,849    | 48,362                          |
| 3_Prime_UTR_variant     | 258,778    | 232,706                     | 62,933    | 43,533                          |
| 5_Prime_UTR_variant     | 74,794     | 64,541                      | 13,056    | 7,855                           |
| Upstream_gene_variant   | 3,087,718  | 2,582,160                   | 853,663   | 508,199                         |
| Downstream_gene_variant | 3,175,525  | 2,651,038                   | 877,657   | 526,415                         |
| TF_binding_site_variant | 10,130     | 7,684                       | 4,916     | 1,774                           |
| Variant effect          |            |                             |           |                                 |
| Splice_acceptor_variant | 1,304      | 1,030                       | 878       | 522                             |
| Splice_donor_variant    | 1,967      | 1,657                       | 373       | 260                             |
| Missense_variant        | 106,221    | 91,887                      | NA        | NA                              |
| Synonymous_variant      | 80,234     | 71,240                      | NA        | NA                              |
| Start_lost              | 303        | 270                         | 52        | 42                              |
| Stop_gained             | 1,851      | 1,567                       | 63        | 50                              |
| Stop_lost               | 166        | 131                         | 44        | 31                              |
| Frameshift_variant      | NA         | NA                          | 2,845     | 2,233                           |

NA, not applicable.

Table S2. Rare monogenic variants with likely clinical correlates by disease group

| Disease group     | Gene   | Disease associated with gene variant                                                              | MOI    | c.HGVs                  | Zygoty | Likely clinical correlates                                                                                                                                            |
|-------------------|--------|---------------------------------------------------------------------------------------------------|--------|-------------------------|--------|-----------------------------------------------------------------------------------------------------------------------------------------------------------------------|
| Pathogenic        |        |                                                                                                   |        |                         |        |                                                                                                                                                                       |
| Neoplasm          | RAD50  | Hereditary cancer-predisposing syndrome                                                           | AD     | c.326_329delCAGA        | Het    | Family history: first degree (maternal two cases colon cancer)                                                                                                        |
| Neoplasm          | NBN    | Hereditary cancer-predisposing syndrome                                                           | AD     | c.657_661delACAAA       | Het    | Family history: second degree (paternal sibling brain cancer)                                                                                                         |
| Neoplasm          | NBN    | Hereditary cancer-predisposing syndrome                                                           | AD     | c.127C > T              | Het    | Family history: first and second degree cancer (mother, brother, father, paternal aunt, paternal uncle)                                                               |
| Neoplasm          | ALDH2  | Aldehyde dehydrogenase deficiency, susceptibility to esophageal cancer                            | AD     | c.1510G > A             | Het    | Affected (metabolomics); family history: first degree cancer (father, brother)                                                                                        |
| Neoplasm          | ALDH2  | Aldehyde dehydrogenase deficiency, susceptibility to esophageal cancer                            | AD     | c.1510G > A             | Het    | Affected (MRI, metabolomics); family history: second degree (paternal grandfather and siblings, paternal uncle)                                                       |
| Neoplasm          | ALDH2  | Aldehyde dehydrogenase deficiency, susceptibility to esophageal cancer                            | AD     | c.1510G > A             | Het    | Affected (MRI, metabolomics); family history: second degree (paternal grandfather and siblings, paternal uncle)                                                       |
| Neoplasm          | ATM    | Hereditary cancer-predisposing syndrome, ataxia telangiectasia                                    | AD, AR | c.6100C > T             | Het    | Affected (history colon cancer); family history: first and second degree cancer (father, maternal grandmother, paternal grandmother)                                  |
| Cardiovascular    | PKP2   | Arrhythmogenic right ventricular dysplasia 9                                                      | AD     | c.314delC               | Het    | Affected (history mitral valve tear); ECHO, ECG, cardiac rhythm monitor; family history: first and second degree myocardial infarction (father, paternal grandfather) |
| Cardiovascular    | APOB   | Familial hypercholesterolemia                                                                     | AD     | c.10580G > A            | Het    | Affected (clinical laboratories, ECHO); family history: first degree and second degree                                                                                |
| Cirrhosis         | HFE    | Hemochromatosis; susceptibility to cirrhosis, diabetes, and liver cancer                          | AR     | c.845G > A              | Homo   | Affected (MRI, ECHO, ECG, cardiac rhythm monitor, metabolomics); family history: first degree affected                                                                |
| Diabetes          | SPINK1 | Pancreatitis; susceptibility to fibrocalculus pancreatic diabetes, tropical calcific pancreatitis | AR, AD | c.101A > G              | Het    | Affected (metabolomics)                                                                                                                                               |
| Diabetes          | SPINK1 | Pancreatitis; susceptibility to fibrocalculus pancreatic diabetes, tropical calcific pancreatitis | AR, AD | c.101A > G              | Het    | Affected (metabolomics)                                                                                                                                               |
| Diabetes          | SPINK1 | Pancreatitis; susceptibility to fibrocalculus pancreatic diabetes, tropical calcific pancreatitis | AR, AD | c.101A > G              | Het    | Affected (clinical laboratories, MRI, metabolomics); family history: first degree (brother)                                                                           |
| Diabetes          | SPINK1 | Pancreatitis; susceptibility to fibrocalculus pancreatic diabetes, tropical calcific pancreatitis | AR, AD | c.101A > G              | Het    | Affected (clinical laboratories, metabolomics)                                                                                                                        |
| Diabetes          | FMO3   | Trimethylaminuria                                                                                 | AR     | c.458C > T              | Homo   | Affected (metabolomics)                                                                                                                                               |
| Metabolic         | ACADM  | MCAD deficiency                                                                                   | AR     | c.1084A > G             | Het    | Affected (metabolomics)                                                                                                                                               |
| Metabolic         | ACADS  | Deficiency of butyryl-CoA dehydrogenase                                                           | AR     | c.319C > T, c.511C > T* | Het    | Affected (metabolomics)                                                                                                                                               |
| Metabolic         | ACSF3  | Combined malonic and methylmalonic aciduria                                                       | AR     | c.1672C > T             | Het    | Affected (metabolomics)                                                                                                                                               |
| Metabolic         | ALDH2  | Aldehyde dehydrogenase deficiency, susceptibility to esophageal cancer                            | AD     | c.1510G > A             | Het    | Affected (metabolomics)                                                                                                                                               |
| Metabolic         | ALDH2  | Aldehyde dehydrogenase deficiency, susceptibility to esophageal cancer                            | AD     | c.1510G > A             | Het    | Affected (metabolomics, MRI)                                                                                                                                          |
| Metabolic         | CTH    | Cystathioninuria                                                                                  | AR     | c.200C > T              | Het    | Affected (metabolomics)                                                                                                                                               |
| Metabolic         | PAH    | Phenylketonuria                                                                                   | AR     | c.814G > T              | Het    | Affected (metabolomics)                                                                                                                                               |
| Likely pathogenic |        |                                                                                                   |        |                         |        |                                                                                                                                                                       |

**Table S2. Cont.**

| Disease group  | Gene      | Disease associated with gene variant                               | MOI    | c.HGVs       | Zygoty | Likely clinical correlates                                                                                                                                         |
|----------------|-----------|--------------------------------------------------------------------|--------|--------------|--------|--------------------------------------------------------------------------------------------------------------------------------------------------------------------|
| Neoplasm       | EPCAM     | Lynch syndrome                                                     | AD     | c.491+1G > A | Het    | Family history: first, second, and third degree cancer (father, two maternal great aunts)                                                                          |
| Neoplasm       | TP53      | Osteosarcoma, Li Fraumeni-like syndrome                            | AD     | c.844C > T   | Het    | Affected; family history: first degree cancer (three relatives)                                                                                                    |
| Neoplasm       | RECQL     | Hereditary cancer-predisposing syndrome                            | AD     | c.643C > T   | Het    | Family history: first and second degree cancer (mother, father, two maternal uncles, two maternal aunts, maternal grandfather)                                     |
| Cardiovascular | KCNH2     | Long QT syndrome                                                   | AD     | c.2785dupG   | Het    | Affected; family history: first degree (brother)                                                                                                                   |
| Other          | TNFRSF13B | Common variable immunodeficiency 2                                 | AR, AD | c.310T > C   | Het    | Affected (clinical laboratories, MRI, metabolomics)                                                                                                                |
| Metabolic      | ASS1      | Citrullinemia                                                      | AR     | c.1030C > T  | Het    | Affected (metabolomics)                                                                                                                                            |
| Metabolic      | GCDH      | Glutaricaciduria                                                   | AR     | c.1093G > A  | Het    | Affected (metabolomics)                                                                                                                                            |
| Metabolic      | PKLR      | Pyruvate kinase deficiency                                         | AR     | c.1456C > T  | Het    | Affected (metabolomics)                                                                                                                                            |
| Metabolic      | SLC7A9    | Cystinuria                                                         | AR     | c.544G > A   | Het    | Affected (metabolomics)                                                                                                                                            |
| Risk factor    | APOE      | Alzheimer's disease                                                | AD     | c.388T > C   | Homo   | Affected; family history: first and second degree (father, both paternal grandparents)                                                                             |
| Neoplasm       | PALB2     | Familial cancer of breast, hereditary cancer-predisposing syndrome | AD     | c.508A > G   | Het    | Affected                                                                                                                                                           |
| Neoplasm       | PMS1      | Lynch syndrome                                                     | AD     | c.1888C > T  | Het    | Affected; family history: second degree cancer (paternal grandparent)                                                                                              |
| Neoplasm       | CHEK2     | Hereditary cancer-predisposing syndrome                            | AD     | c.190G > A   | Het    | Family history: first and second degree (father, maternal grandmother)                                                                                             |
| Neoplasm       | RAD50     | Hereditary cancer-predisposing syndrome                            | AD     | c.2177G > A  | Het    | Affected; family history: first and second degree (father, sister, paternal aunts)                                                                                 |
| Cardiovascular | DSP       | Arrhythmogenic right ventricular dysplasia                         | AD     | c.8531G > T  | Het    | Affected (cardiac rhythm monitor); family history: first and second degree (father, mother, paternal grandfather, maternal grandparents, maternal aunt)            |
| Cardiovascular | DSP       | Arrhythmogenic right ventricular dysplasia                         | AD     | c.8531G > T  | Het    | Affected (cardiac rhythm monitor); family history: first and second degree (father, mother, paternal grandfather, maternal grandparents, maternal aunt)            |
| Cardiovascular | DSP       | Arrhythmogenic right ventricular dysplasia                         | AD     | c.8531G > T  | Het    | Affected (ECHO, ECG, cardiac rhythm monitor); family history: first and second degree (father, mother, paternal grandfather, maternal grandparents, maternal aunt) |
| Cardiovascular | APOB      | Familial hypercholesterolemia                                      | AD     | c.9452C > T  | Het    | Affected (clinical laboratories); family history: first degree (mother)                                                                                            |
| Cardiovascular | APOB      | Familial hypercholesterolemia                                      | AD     | c.9452C > T  | Het    | Affected (clinical laboratories); family history: first and second degree (mother, father, paternal grandparents, maternal grandparents)                           |
| Cardiovascular | APOB      | Familial hypercholesterolemia                                      | AD     | c.9452C > T  | Het    | Affected (clinical laboratories); family history: first and second degree (mother, father, paternal grandparents, maternal grandparents)                           |
| Cardiovascular | MYBPC3    | Dilated cardiomyopathy, hypertrophic cardiomyopathy                | AD     | c.1468G > A  | Het    | Affected (ECHO); family history: first and second degree: father, two brothers, two sisters, maternal grandfather)                                                 |



**Table S3. Previously unrecognized age-related chronic diseases requiring prompt (<30 d) medical attention**

| Disease group           | Sex | Age, y | Findings and follow-up                                                                                                                                                                                                                                                                                                                                                                                                                                                                                                                     |
|-------------------------|-----|--------|--------------------------------------------------------------------------------------------------------------------------------------------------------------------------------------------------------------------------------------------------------------------------------------------------------------------------------------------------------------------------------------------------------------------------------------------------------------------------------------------------------------------------------------------|
| Cardiovascular diseases | M   | 67     | Past medical history: no history of cardiovascular disease. Finding: initial bundle branch block/IVCD; atrial fibrillation burden 1%. Follow-up: pending                                                                                                                                                                                                                                                                                                                                                                                   |
| Cardiovascular diseases | M   | 47     | Finding: right common iliac artery aneurysm measuring 2.6 cm. No involvement of abdominal aorta or internal or external iliac arteries. Recommend CT angiogram for further evaluation and confirmation. Follow-up: pending                                                                                                                                                                                                                                                                                                                 |
| Cardiovascular diseases | M   | 68     | Medical history: increased blood pressure, increased cholesterol. Finding: paroxysmal atrial fibrillation; atrial fibrillation burden 3%. Follow-up: individual now taking anticoagulant                                                                                                                                                                                                                                                                                                                                                   |
| Cardiovascular diseases | M   | 73     | Medical history: increased blood pressure. Finding: first degree atrioventricular block; atrial fibrillation burden 7%. Follow-up: individual now taking anticoagulant                                                                                                                                                                                                                                                                                                                                                                     |
| Cardiovascular diseases | F   | 64     | Medical history: increased cholesterol, increased blood pressure. Finding: atrial fibrillation burden 2%. Follow-up: pending                                                                                                                                                                                                                                                                                                                                                                                                               |
| Cardiovascular diseases | F   | 66     | Finding: limited noncontrast neck MRA. String of beads appearance to the bilateral cervical internal carotid arteries may represent fibromuscular dysplasia. Motion artifact is considered less likely. Recommend i.v. contrast-enhanced CT or MR angiogram of the carotid arteries for further evaluation. Follow-up: CT with contrast for scans of carotid and renal arteries; nothing to report                                                                                                                                         |
| Cardiovascular diseases | F   | 47     | Medical history: high cholesterol. Finding: a 5-mm aneurysm originating from the left cavernous ICA just proximal to the ophthalmic artery. Recommend neurosurgery evaluation. Consider CT or conventional angiogram. Follow-up: pending                                                                                                                                                                                                                                                                                                   |
| Cardiovascular diseases | F   | 61     | Finding: head: noncontrast brain MRA; 50% loss of signal of the left internal carotid artery at the junction of the cavernous and petrous portions may represent artifact vs. partial narrowing. Recommend CT angiogram of the brain for further evaluation. Chest: 4- × 2-cm lesion in the medial right lower lobe. Suggestion of connection to the pulmonary vessels. Recommend CT chest to rule out pulmonary arteriovenous malformation. Other considerations include mass, sarcoid, sequestration, or atelectasis. Follow-up: pending |
| Neoplasm                | M   | 63     | Medical history: melanoma finding. A 3-cm lobulated contour of the left kidney may represent a benign dromedary hump. However, there is limited evaluation. Recommend renal ultrasound to rule out a mass. Follow-up: surgically resected and found to be high-grade early-stage renal cell carcinoma                                                                                                                                                                                                                                      |
| Neoplasm                | M   | 56     | Finding: 5-cm anterior mediastinal mass with differential including lymphoma, thymoma, or germ cell tumor. The mass is most likely a thymoma, likely stage 1 or 2. There is no obvious vascular invasion and no lymph nodes. Recommend contrast-enhanced CT and thoracic surgery consultation. Follow-up: thymoma                                                                                                                                                                                                                          |
| Neoplasm                | M   | 33     | Finding: 1.5- × 1.9-cm cystic lesion in the left parotid gland with differential including sialoceles, pleomorphic adenoma, lymphatic malformation, or first branchial cleft cyst. Favor a pleomorphic adenoma. Recommend contrast-enhanced MRI or CT for further evaluation along with ENT surgery consultation. Follow-up: pleomorphic adenoma, biopsy pending                                                                                                                                                                           |
| Neoplasm                | M   | 65     | Finding: two lesions noted, the most concerning of which is a PIRADS 4 lesion in the left posterior peripheral zone. Recommend urology consultation to consider targeted biopsy. The anterior transitional zone lesion is a PIRADS 3 lesion, which may represent a BPH nodule, although neoplasia is within the differential. Follow-up: prostate cancer confirmed                                                                                                                                                                         |
| Neoplasm                | M   | 69     | Finding: prostate volume of 52 cc (normal range is 15–30 cc). Right lateral peripheral/transitional zone lesion as noted above is stable going back two examinations from 1/4/14 and 1/9/13. The lesion is categorized as PIRADS 3. Favor BPH nodule given stability, but neoplasia is within the differential. Recommend close imaging follow-up. Follow-up: prostate cancer confirmed and surgically resected                                                                                                                            |
| Neoplasm risk           | M   | 57     | Finding: abdomen: 4.8-cm complex left renal cyst with septations. Although this may represent a complex benign cyst, cystic renal cell carcinoma is not excluded. Recommend renal mass protocol CT or MRI for further evaluation. Follow-up: CT imaging of renal cyst indicated Bosniak stage 2                                                                                                                                                                                                                                            |
| Neoplasm risk           | M   | 70     | Medical history: history of nonmelanoma skin cancer. Finding: a 2.5-cm complex lesion in the lower pole of the left kidney with differential considerations, including hemorrhagic cyst. A solid mass is not entirely excluded. Recommend ultrasound or contrast-enhanced CT for further evaluation. Follow-up: repeat CT for kidney mass repeated. No significant findings reported                                                                                                                                                       |

**Table S3. Cont.**

| Disease group | Sex | Age, y | Findings and follow-up                                                                                                                                                                                                                                                                                                                                                                                                                                                                                                                                                                                                                                                                                                                  |
|---------------|-----|--------|-----------------------------------------------------------------------------------------------------------------------------------------------------------------------------------------------------------------------------------------------------------------------------------------------------------------------------------------------------------------------------------------------------------------------------------------------------------------------------------------------------------------------------------------------------------------------------------------------------------------------------------------------------------------------------------------------------------------------------------------|
| Other         | F   | 69     | Finding: alkaline phosphatase, S 229 (abnormal flag: H); alanine aminotransferase 77 (abnormal flag: H); aspartate aminotransferase 73 (abnormal flag: H); C-reactive protein, quant 7 (abnormal flag: H); cancer antigen 19–9 101 (abnormal flag: H); cancer antigen 125 58.5 (abnormal flag: H); cholesterol, total 253 (abnormal flag: H); cystatin C 1.05 (abnormal flag: H); ferritin, serum 209 (abnormal flag: H); fibrinogen antigen 366 (abnormal flag: H); GGT 515 (abnormal flag: H); iron, serum 161 (abnormal flag: H); LDL cholesterol calc 152 (abnormal flag: H); Lp-PLA <sub>2</sub> 386 (abnormal flag: H); platelets 130 (abnormal flag: L). Follow-up: finding of primary biliary cholangitis based on liver biopsy |
| Other         | M   | 66     | Medical history: history of kidney stones (6). Finding: xanthinuria on metabolome analysis (xanthine kidney stones). Follow-up: pending                                                                                                                                                                                                                                                                                                                                                                                                                                                                                                                                                                                                 |

The Global Burden of Disease benchmarks for health loss from death or disability was used to categorize our findings based on the leading causes of and/or risks for noncommunicable death. BPH, benign prostatic hyperplasia; CT, computed tomography; ENT, ear, nose, and throat; GGT, gamma-glutamyl transferase; ICA, intracranial aneurysm; IVCD, interventricular conduction delay; F, female; Lp-PLA<sub>2</sub>, lipoprotein-associated phospholipase A<sub>2</sub>; M, male; MR, magnetic resonance; MRA, magnetic resonance angiogram; PIRADS, prostate imaging reporting and data system.

**Table S4. Validated questions from the NHANES**

| Instrument       | Questions                                                   | Website                                                                                                                 |
|------------------|-------------------------------------------------------------|-------------------------------------------------------------------------------------------------------------------------|
| NHANES 2013–2014 | ALQ101_had at least 12 alcoholic drinks per 1 y             | <a href="https://wwwn.cdc.gov/Nchs/Nhanes/2013-2014/MCQ_H.htm">https://wwwn.cdc.gov/Nchs/Nhanes/2013-2014/MCQ_H.htm</a> |
| NHANES 2013–2014 | SMQ020_smoked at least 100 cigarettes in life               | <a href="https://wwwn.cdc.gov/Nchs/Nhanes/2013-2014/MCQ_H.htm">https://wwwn.cdc.gov/Nchs/Nhanes/2013-2014/MCQ_H.htm</a> |
| NHANES 2013–2014 | BPQ020_ever told you had high blood pressure                | <a href="https://wwwn.cdc.gov/Nchs/Nhanes/2013-2014/MCQ_H.htm">https://wwwn.cdc.gov/Nchs/Nhanes/2013-2014/MCQ_H.htm</a> |
| NHANES 2013–2014 | BPQ040A_taking prescription for hypertension                | <a href="https://wwwn.cdc.gov/Nchs/Nhanes/2013-2014/MCQ_H.htm">https://wwwn.cdc.gov/Nchs/Nhanes/2013-2014/MCQ_H.htm</a> |
| NHANES 2013–2014 | BPQ080_doctor told you that you have high cholesterol level | <a href="https://wwwn.cdc.gov/Nchs/Nhanes/2013-2014/MCQ_H.htm">https://wwwn.cdc.gov/Nchs/Nhanes/2013-2014/MCQ_H.htm</a> |
| NHANES 2013–2014 | BPQ090D_told to take prescription for cholesterol           | <a href="https://wwwn.cdc.gov/Nchs/Nhanes/2013-2014/MCQ_H.htm">https://wwwn.cdc.gov/Nchs/Nhanes/2013-2014/MCQ_H.htm</a> |
| NHANES 2013–2014 | BPQ100D_now taking prescribed medicine                      | <a href="https://wwwn.cdc.gov/Nchs/Nhanes/2013-2014/MCQ_H.htm">https://wwwn.cdc.gov/Nchs/Nhanes/2013-2014/MCQ_H.htm</a> |
| NHANES 2013–2014 | DIQ010_doctor told you that you have diabetes               | <a href="https://wwwn.cdc.gov/Nchs/Nhanes/2013-2014/MCQ_H.htm">https://wwwn.cdc.gov/Nchs/Nhanes/2013-2014/MCQ_H.htm</a> |
| NHANES 2013–2014 | MCQ300C_close relative had diabetes                         | <a href="https://wwwn.cdc.gov/Nchs/Nhanes/2013-2014/MCQ_H.htm">https://wwwn.cdc.gov/Nchs/Nhanes/2013-2014/MCQ_H.htm</a> |
| NHANES 2011–2012 | KIQ022_ever told you had weak/failing kidneys               | <a href="https://wwwn.cdc.gov/Nchs/Nhanes/2011-2012/MCQ_G.htm">https://wwwn.cdc.gov/Nchs/Nhanes/2011-2012/MCQ_G.htm</a> |
| NHANES 2013–2014 | MCQ084_difficulties in thinking or remembering              | <a href="https://wwwn.cdc.gov/Nchs/Nhanes/2013-2014/MCQ_H.htm">https://wwwn.cdc.gov/Nchs/Nhanes/2013-2014/MCQ_H.htm</a> |
| NHANES 2013–2014 | MCQ160B_ever told you had congestive heart failure          | <a href="https://wwwn.cdc.gov/Nchs/Nhanes/2013-2014/MCQ_H.htm">https://wwwn.cdc.gov/Nchs/Nhanes/2013-2014/MCQ_H.htm</a> |
| NHANES 2013–2014 | MCQ160C_ever told you had coronary heart disease            | <a href="https://wwwn.cdc.gov/Nchs/Nhanes/2013-2014/MCQ_H.htm">https://wwwn.cdc.gov/Nchs/Nhanes/2013-2014/MCQ_H.htm</a> |
| NHANES 2013–2014 | MCQ180C_age when told that you had coronary heart disease   | <a href="https://wwwn.cdc.gov/Nchs/Nhanes/2013-2014/MCQ_H.htm">https://wwwn.cdc.gov/Nchs/Nhanes/2013-2014/MCQ_H.htm</a> |
| NHANES 2013–2014 | MCQ160E_ever told you had heart attack                      | <a href="https://wwwn.cdc.gov/Nchs/Nhanes/2013-2014/MCQ_H.htm">https://wwwn.cdc.gov/Nchs/Nhanes/2013-2014/MCQ_H.htm</a> |
| NHANES 2013–2014 | MCQ300A_close relative had heart attack                     | <a href="https://wwwn.cdc.gov/Nchs/Nhanes/2013-2014/MCQ_H.htm">https://wwwn.cdc.gov/Nchs/Nhanes/2013-2014/MCQ_H.htm</a> |
| NHANES 2013–2014 | MCQ160F_ever told you had a stroke                          | <a href="https://wwwn.cdc.gov/Nchs/Nhanes/2013-2014/MCQ_H.htm">https://wwwn.cdc.gov/Nchs/Nhanes/2013-2014/MCQ_H.htm</a> |
| NHANES 2013–2014 | MCQ160L_ever told you had any liver condition               | <a href="https://wwwn.cdc.gov/Nchs/Nhanes/2013-2014/MCQ_H.htm">https://wwwn.cdc.gov/Nchs/Nhanes/2013-2014/MCQ_H.htm</a> |
| NHANES 2013–2014 | MCQ160O_ever told you had COPD                              | <a href="https://wwwn.cdc.gov/Nchs/Nhanes/2013-2014/MCQ_H.htm">https://wwwn.cdc.gov/Nchs/Nhanes/2013-2014/MCQ_H.htm</a> |
| NHANES 2013–2014 | MCQ220_ever told you had cancer or malignancy               | <a href="https://wwwn.cdc.gov/Nchs/Nhanes/2013-2014/MCQ_H.htm">https://wwwn.cdc.gov/Nchs/Nhanes/2013-2014/MCQ_H.htm</a> |
| NHANES 2013–2014 | MCQ230A-D_what kind of cancer                               | <a href="https://wwwn.cdc.gov/Nchs/Nhanes/2013-2014/MCQ_H.htm">https://wwwn.cdc.gov/Nchs/Nhanes/2013-2014/MCQ_H.htm</a> |
| NHANES 2003–2004 | MCQ250B_blood relatives have Alzheimer's                    | <a href="https://wwwn.cdc.gov/Nchs/Nhanes/2003-2004/MCQ_C.htm">https://wwwn.cdc.gov/Nchs/Nhanes/2003-2004/MCQ_C.htm</a> |

The NHANES information is at <https://www.cdc.gov/nchs/nhanes/>. COPD, chronic obstructive pulmonary disease.

**Table S5. A list of routine clinical laboratory tests**

|                               |                        |                                 |
|-------------------------------|------------------------|---------------------------------|
| Antimyeloperoxidase Abs       | Eos                    | Insulin                         |
| Antinuclear antibodies        | Eos (absolute)         | LH                              |
| Apolipoprotein B/A-1 ratio    | Estradiol              | Prolactin                       |
| Apolipoprotein A-1            | Ferritin, serum        | Lipase, serum                   |
| Apolipoprotein B              | FSH                    | Cholesterol, total              |
| C-reactive protein, quant     | Hemoglobin             | HDL cholesterol                 |
| Calcitonin, serum             | Hemoglobin A1c         | LDL cholesterol calc            |
| Calcitriol(1,25 di-OH vit D)  | Immature grans (Abs)   | Triglycerides                   |
| CCP antibodies IgG/IgA        | Immature granulocytes  | VLDL cholesterol cal            |
| AFP, serum, tumor marker      | Iron binding capacity  | Lipoprotein (a)                 |
| Cancer antigen 19–9           | Iron saturation        | Lp-PLA <sub>2</sub>             |
| Cancer antigen 125            | Iron, serum            | hCG, beta Subunit, Qnt, serum   |
| CEA                           | Lymphs                 | Progesterone                    |
| Albumin, serum                | Lymphs (absolute)      | A/G ratio                       |
| Alkaline phosphatase, S       | MCH                    | Albumin                         |
| Alanine aminotransferase      | MCHC                   | Alpha-1-globulin                |
| Aspartate aminotransferase    | MCV                    | Alpha-2-globulin                |
| Bilirubin, direct             | Monocytes              | Beta globulin                   |
| Bilirubin, total              | Monocytes (absolute)   | Gamma globulin                  |
| BUN                           | Neutrophils            | % Free PSA*                     |
| BUN/creatinine ratio          | Neutrophils (absolute) | Prostate-specific Ag, serum*    |
| Calcium, serum                | Platelets              | PSA, free*                      |
| Carbon dioxide, total         | RBC                    | PTH, intact                     |
| Chloride, serum               | RDW                    | Selenium, serum/plasma          |
| Creatinine, serum             | Testosterone, serum    | Free thyroxine index            |
| eGFR if African American      | TSH                    | T3 uptake                       |
| eGFR if not African American  | UIBC                   | Reverse T3, serum               |
| Globulin, total               | Vitamin D, 25-hydroxy  | Thyroid peroxidase Ab           |
| Glucose, serum                | WBC                    | Sex horm binding glob, serum    |
| LDH                           | Fibrinogen antigen     | Testost., % free + weakly bound |
| Magnesium, serum              | Folate, hemolysate     | Testost., free + weakly bound   |
| Potassium, serum              | Folate, RBC            | Thyroxine (T4)                  |
| Protein, total, serum         | Hematocrit             | t-Transglutaminase IgA          |
| Sodium, serum                 | GGT                    | t-Transglutaminase IgG          |
| Uric acid, serum              | Hep A Ab, total        | Vitamin A, serum                |
| Copper, whole blood           | Hep B surface Ab, qual | Vitamin B1, whole blood         |
| Cortisol                      | Hep C virus Ab         | Vitamin B12                     |
| Creatine kinase, total, serum | Arsenic, blood         | Zinc, whole blood               |
| Cystatin C                    | Cadmium, blood         |                                 |
| DHEA-sulfate                  | Lead, blood            |                                 |
| Baso (absolute)               | Mercury, blood         |                                 |
| Basos                         | Homocyst(e)ine, plasma |                                 |

AFP, alpha-fetoprotein; A/G, albumin/globulin ratio; BUN, blood urea nitrogen; CCP, cyclic citrullinated peptide; CEA, carcinoembryonic antigen; DHEA, dehydroepiandrosterone; eGFR, estimated glomerular filtration rate; FSH, follicle-stimulating hormone; GGT, gamma-glutamyl transferase; hCG, human chorionic gonadotropin; HDL, high-density lipoprotein; LDH, lactate dehydrogenase; LDL, low-density lipoprotein; LH, luteinizing hormone; Lp-PLA<sub>2</sub>, lipoprotein-associated phospholipase A<sub>2</sub>; MCH, mean corpuscular hemoglobin; MCHC, mean corpuscular hemoglobin concentration; MCV, mean corpuscular volume; PSA, prostate specific antigen; PTH, parathyroid hormone; RDW, red cell distribution width; TSH, thyroid stimulating hormone; UIBC, unsaturated iron binding capacity; VLDL, very low-density lipoprotein.

\*Obtained for males only.
